# Supplementary material for: The fertilization-induced zinc spark is a novel biomarker of mouse embryo quality and early development
Source: PubMed Central journal article supplement (PMC4796984; doi:10.1038/srep22772), 2016-03-18
Supplement: srep22772-s1.pdf [file srep22772-s1.pdf]

1 **The fertilization-induced zinc spark is a novel biomarker of mammalian**  
2 **embryo quality and early development**

3

4

5 **Authors:** Nan Zhang<sup>1</sup>, Francesca E Duncan<sup>1</sup>, Emily L. Que<sup>2</sup>, Thomas V. O'Halloran<sup>2, 3\*</sup>  
6 & Teresa K. Woodruff<sup>1\*</sup>

7

8 **Affiliations:**

9 <sup>1</sup>Department of Obstetrics and Gynecology, Feinberg School of Medicine, Northwestern  
10 University, Chicago, IL 60611, USA.

11 <sup>2</sup>The Chemistry of Life Processes Institute, Northwestern University, Evanston, IL  
12 60208, USA.

13 <sup>3</sup>Department of Chemistry and Department of Molecular Biosciences, Northwestern  
14 University, Evanston, IL 60208, USA

15

16 \*To whom correspondence should be addressed: tkw@northwestern.edu, t-  
17 ohalloran@northwestern.edu

18

19

20

21

1 **Supplementary Materials:**

2 Fig. S1 shows a typical zinc spark induced by Ca-Iono and all the key parameters  
3 we used to analyze a zinc spark, which include amplitude (maximum peak height),  
4 integrated intensity (area under the curve), duration and rate of rise calculated as  
5 amplitude divided by the rising time.

6 We regularly tested the fertilization medium and culture conditions by performing  
7 standard IVF for 6 hours (materials and methods) and found that ~80% of the eggs could  
8 reach pronuclear-stage (PN) 8 hours after the initiation of fertilization (Fig. S2A, control  
9 group). To make sure that the eggs are fertilizable under the zinc imaging conditions, we  
10 also employed zona pellucida free (ZP free) eggs in our studies as removal of the zona  
11 pellucida is a common treatment that has been used to speed up sperm entry and  
12 counteract the deleterious effects of fluorescence imaging on the fertilization rate (43,  
13 44). In our hands, we found that over 80% of the ZP free eggs could be fertilized during a  
14 2-hour imaging period (Fig. S2A, -ZP group). We also confirmed that fertilization  
15 occurred based on the observation of multiple calcium transients similar to calcium  
16 oscillations reported by previous studies (Fig. S2B) (33). These findings suggest that the  
17 current imaging condition did not severely affect the health status of both eggs and  
18 sperms and the observation of single zinc spark during IVF is a physiological  
19 phenomenon.

20 Fig. S3 is a max intensity projection of zinc spark imaging following activation by  
21 5 $\mu$ M Ca-Ionomycin. These resulting parthenotes were cultured for 120 hours and the  
22 developmental results were denoted on each egg. This data directly visualizes the close  
23 correlation between zinc spark profile and embryo development in mouse.

24

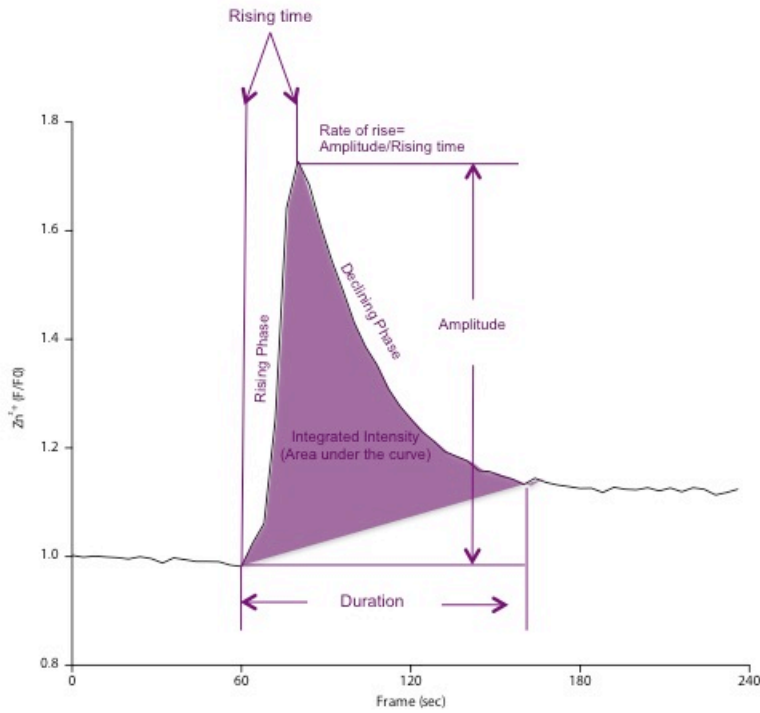

1

2 **Fig. S1. Definition of key parameters of a representative zinc spark induced by 5 $\mu$ M**  
 3 **Ca-Iono**

4 Amplitude is a measurement from the base line to the highest point of the wave. Duration  
 5 of a zinc spark, rising phase and declining phase are denoted in the figure. Integrated  
 6 Intensity of the zinc spark is calculated as the area under the curve. Rate of rise is  
 7 calculated as the amplitude divided by the rising time.

8

9

10

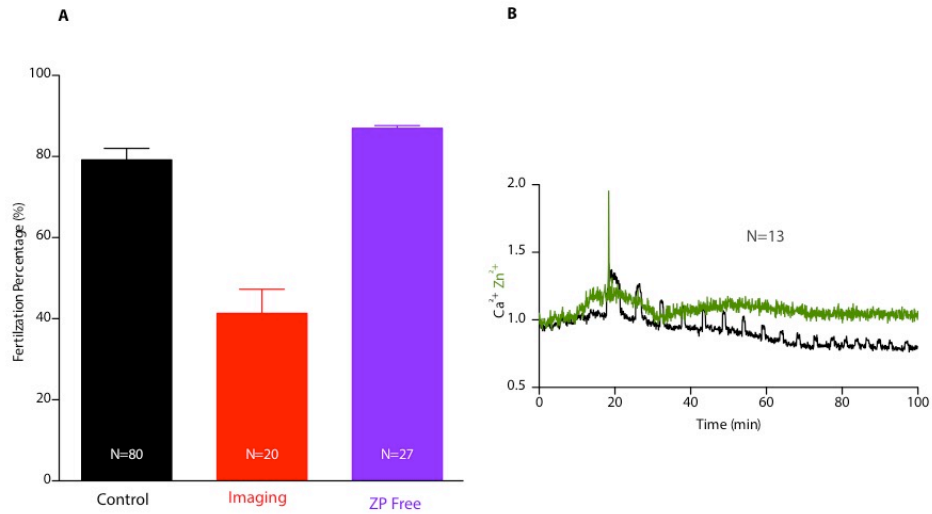

1

2 **Fig. S2. Eggs are fertilizable under the optimized zinc imaging condition**

3 (A) Fertilization rate of eggs under various conditions: Control group (Standard IVF  
 4 without any treatments required by imaging), imaging group (Momentary serum free  
 5 medium and 2-hour fluorescence imaging in the presence of FZ3) and ZP free group (IVF  
 6 of ZP free eggs under the same condition as imaging group). (B) Representative time  
 7 traces of  $[Ca^{2+}]_i$  (green) and zinc sparks (pink) during IVF.

8

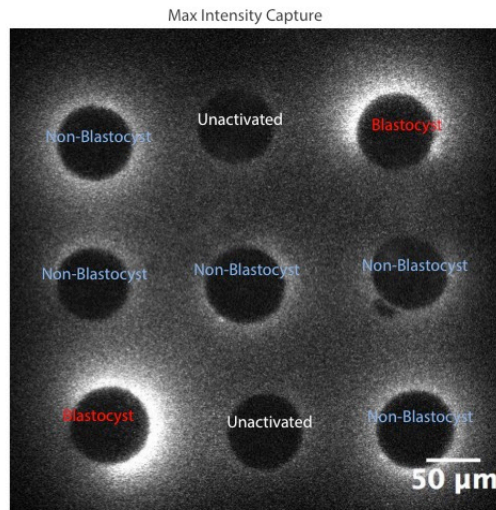

1

2 **Fig. S3. Fluorescence intensity of zinc spark is closely related to the developmental**  
 3 **outcome**

4 Max intensity projection of zinc spark imaging following activation by 5μM Ca-  
 5 Ionomycin (Movie S1). The developmental results were denoted on each egg.

6 **Supplementary Figures**

7 Fig. S1. Definition of key parameters of a zinc spark

8 Fig. S2. Fertilization rate under different imaging conditions

9 Fig. S3. Fluorescence intensity of the zinc spark is closely related to the developmental  
 10 outcome

11 **Supplementary Files**

12 Movie S1. Ca-Iono induced zinc spark. (Scale bar 50 μm.)

13 Movie S2. Fertilization induced zinc spark. (The egg in the bottom right is presented in

14 Fig. 2A. Scale bar 50 μm.)
